# Supplementary material
Source: MDPI journal article supplement (https://www.mdpi.com/2073-4433/12/5/561)
Supplement: s1 [file s1]

# Supplementary Materials:

Adrienn Varga-Balogh <sup>1</sup>, Ádám Leelőssy <sup>1,\*</sup> and Róbert Mészáros <sup>1</sup>

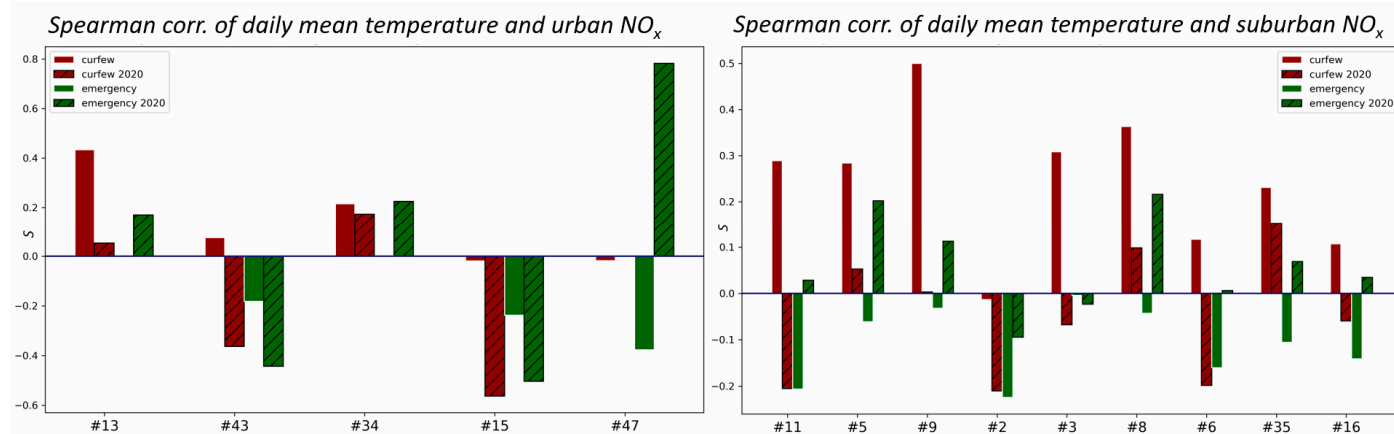

**Figure S1.** Spearman correlation between daily mean temperature and NO<sub>x</sub> concentrations at selected urban (left) and suburban (right) monitoring sites. Solid red column: correlation in the curfew period 28 March – 4 May in the years 2014–2019. Solid green column: correlation in the emergency period 12 March – 16 June in the years 2014–2019. Striped columns: correlations obtained for the respective period in the year 2020.

**Table S1.** Spearman correlations and corresponding p-values between daily mean temperature and NO<sub>x</sub> concentrations at selected monitoring sites in the years 2014–2019.

| Station | Spearman correlation (p-value)   |                                       |
|---------|----------------------------------|---------------------------------------|
|         | Curfew period (28 March – 4 May) | Emergency period (12 March – 16 June) |
| #12     | 0.34 (<0.001)                    | -0.06 (0.20)                          |
| #10     | 0.13 (0.16)                      | 0.02 (0.76)                           |
| #13     | 0.43 (<0.001)                    | -0.002 (0.97)                         |
| #11     | 0.29 (<0.001)                    | -0.21 (<0.001)                        |
| #5      | 0.28 (0.09)                      | -0.06 (0.56)                          |
| #9      | 0.50 (<0.001)                    | -0.03 (0.47)                          |
| #2      | -0.01 (0.93)                     | -0.22 (0.03)                          |
| #3      | 0.31 (0.007)                     | -0.004 (0.95)                         |
| #8      | 0.36 (<0.001)                    | -0.04 (0.49)                          |
| #6      | 0.12 (0.08)                      | -0.16 (<0.001)                        |
| #43     | 0.07 (0.26)                      | -0.18 (<0.001)                        |
| #35     | 0.23 (<0.001)                    | -0.11 (0.02)                          |
| #34     | 0.22 (0.002)                     | 0.0006 (0.99)                         |
| #36     | 0.16 (0.03)                      | -0.17 (<0.001)                        |
| #15     | -0.02 (0.77)                     | -0.24 (<0.001)                        |
| #16     | 0.11 (0.11)                      | -0.14 (<0.001)                        |
| #47     | -0.02 (0.78)                     | -0.38 (<0.001)                        |

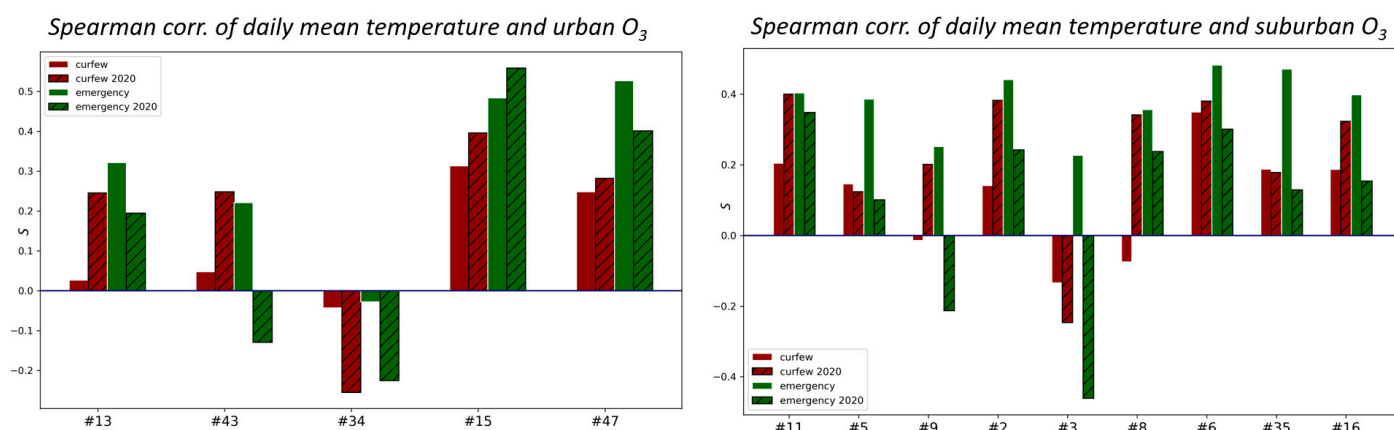

**Figure S2.** Spearman correlation between daily mean temperature and O<sub>3</sub> concentrations at selected urban (left) and suburban (right) monitoring sites. Solid red column: correlation in the curfew period 28 March – 4 May in the years 2014–2019. Solid green column: correlation in the emergency period 12 March – 16 June in the years 2014–2019. Striped columns: correlations obtained for the respective period in the year 2020.

**Table S2.** Spearman correlations and corresponding p-values between daily mean temperature and O<sub>3</sub> concentrations at selected monitoring sites in the years 2014–2019.

| Spearman correlation (p-value) |                                  |                                       |
|--------------------------------|----------------------------------|---------------------------------------|
| Station                        | Curfew period (28 March – 4 May) | Emergency period (12 March – 16 June) |
| #12                            | -0.10 (0.13)                     | 0.34 (<0.001)                         |
| #10                            | 0.13 (0.09)                      | 0.48 (<0.001)                         |
| #13                            | 0.03 (0.69)                      | 0.32 (<0.001)                         |
| #11                            | 0.20 (0.002)                     | 0.40 (<0.001)                         |
| #5                             | 0.15 (0.26)                      | 0.39 (<0.001)                         |
| #9                             | -0.01 (0.83)                     | 0.25 (<0.001)                         |
| #2                             | 0.14 (0.12)                      | 0.44 (<0.001)                         |
| #3                             | -0.13 (0.07)                     | 0.23 (<0.001)                         |
| #8                             | -0.07 (0.31)                     | 0.36 (<0.001)                         |
| #6                             | 0.35 (<0.001)                    | 0.48 (<0.001)                         |
| #43                            | 0.05 (0.48)                      | 0.22 (<0.001)                         |
| #35                            | 0.19 (0.01)                      | 0.47 (<0.001)                         |
| #34                            | -0.04 (0.53)                     | -0.03 (0.51)                          |
| #36                            | 0.10 (0.13)                      | 0.24 (<0.001)                         |
| #15                            | 0.31 (<0.001)                    | 0.48 (<0.001)                         |
| #16                            | 0.19 (0.008)                     | 0.40 (<0.001)                         |
| #47                            | 0.25 (<0.001)                    | 0.53 (<0.001)                         |

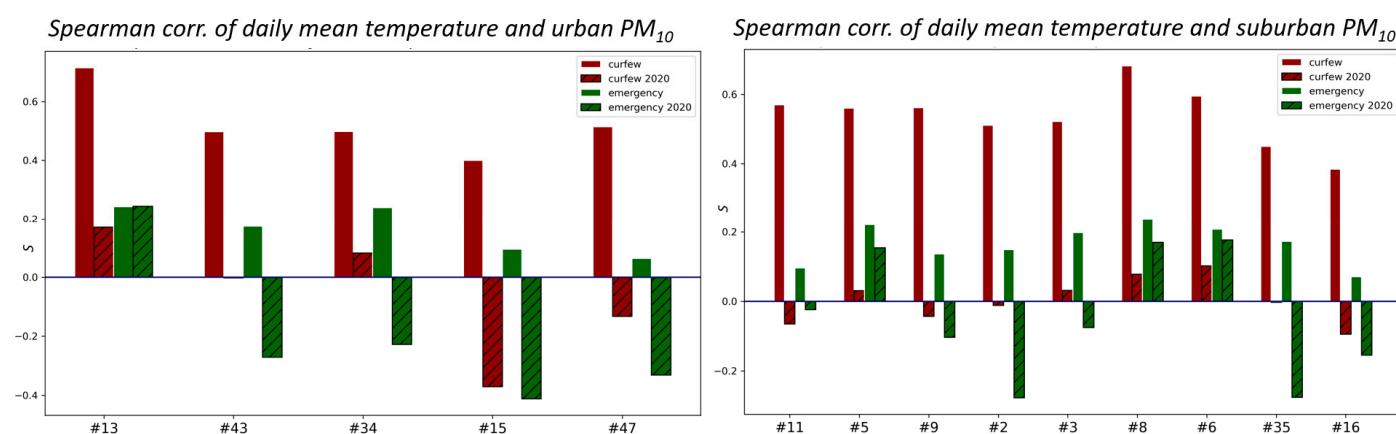

**Figure S3.** Spearman correlation between daily mean temperature and PM<sub>10</sub> concentrations at selected urban (left) and suburban (right) monitoring sites. Solid red column: correlation in the curfew period 28 March – 4 May in the years 2014–2019. Solid green column: correlation in the emergency period 12 March – 16 June in the years 2014–2019. Striped columns: correlations obtained for the respective period in the year 2020.

**Table S3.** Spearman correlations and corresponding p-values between daily mean temperature and PM<sub>10</sub> concentrations at selected monitoring sites in the years 2014–2019.

| Station | Spearman correlation (p-value)   |                                       |
|---------|----------------------------------|---------------------------------------|
|         | Curfew period (28 March – 4 May) | Emergency period (12 March – 16 June) |
| #12     | 0.55 (<0.001)                    | 0.19 (<0.001)                         |
| #10     | 0.53 (<0.001)                    | 0.23 (<0.001)                         |
| #13     | 0.72 (<0.001)                    | 0.24 (<0.001)                         |
| #11     | 0.57 (<0.001)                    | 0.10 (0.02)                           |
| #5      | 0.56 (<0.001)                    | 0.22 (<0.001)                         |
| #9      | 0.56 (<0.001)                    | 0.14 (0.001)                          |
| #2      | 0.51 (<0.001)                    | 0.15 (<0.001)                         |
| #3      | 0.52 (<0.001)                    | 0.20 (<0.001)                         |
| #8      | 0.68 (<0.001)                    | 0.24 (<0.001)                         |
| #6      | 0.60 (<0.001)                    | 0.21 (<0.001)                         |
| #43     | 0.50 (<0.001)                    | 0.17 (<0.001)                         |
| #35     | 0.45 (<0.001)                    | 0.17 (<0.001)                         |
| #34     | 0.50 (<0.001)                    | 0.24 (<0.001)                         |
| #36     | 0.26 (<0.001)                    | -0.06 (0.16)                          |
| #15     | 0.40 (<0.001)                    | 0.10 (0.02)                           |
| #16     | 0.38 (<0.001)                    | 0.07 (0.10)                           |
| #47     | 0.51 (<0.001)                    | 0.06 (0.15)                           |
